# Supplementary material
Source: publisher figshare collection journal article supplement (https://tandf.figshare.com/ndownloader/files/21748845)
Supplement: Supplementary file 1 [file 21748845]

**Annex 1: Working groups and organizations**

| Group 1   - Swedish Outdoor Association (Friluftsfrämjandet) - Swedish Society for Nature Conservation SSNC (Naturskyddsföreningen) - Bergqvist-Insjön (sawmill company) - Swedish Union of Forestry, Wood and Graphical Workers (GS-Facket) - Jämtland Härjedalen Tourism (Jämtland Härjedalen Turism) - Rural Sweden (Hela Sverige ska leva) - National Association for Small-Scale Wood Processing (Småsågarnas Riksförbund) - Swedish Hunting Association (Svenska Jägarförbundet) - Swedish Forest Society Foundation (Skogssällskapet) - Hobby Gaming Association (Sverok) - Commonland District Association (Häradsallmänningsförbundet) - Forest-Owner Association (Mellanskog) - Bergvik Skog (forest industry) - Federation of Swedish Forestry and Agricultural Employers SLA (Skogs- och Lantarbetsgivareförbundet) - World Wide Fund for Nature WWF (Världsnaturfonden). | Group 2   - World Wide Fund for Nature WWF (Världsnaturfonden) - National History Museum (Naturhistoriska Riksmuseet) - Sveaskog (forest industry) - SCA (forest industry) - Skogforsk (central research body for the Swedish forestry sector) - Federation of Swedish Family Forest Owners (LRF Skogsägarna) - IVL Swedish Environmental Research Institute - Swedish Ornithology Association (SOI) (Sveriges Ornitologiska Förening) - Swedish Society for Nature Conservation SSNC (Naturskyddsföreningen) - Swedish Hunting Association (Svenska Jägarförbundet) - Swedish Sami Council (Svenska Samernas Riksförbund) - Södra Skogsägarna (forest-owner association) |
| --- | --- |
| Group 3   - VKAB - Växjö municipality owned corporation (Växjö Kommunföretag) - Setra (wood production company) - Billerud Korsnäs AB (forest industry) - Swedish Union of Forestry, Wood and Graphical Workers (GS-Facket) - Fortum (energy company) and Mälardalen University (Mälardalens Högskola) (one person representing both) - Swedish Association of Forestry Contractors (SMF Skogsentreprenörerna) - Paper Province (forest-based bioeconomy company cluster) - Swedish Forest Industries Federation (Skogsindustrierna) - Norra Skogsägarna (forest-owner association) - Forest Sector Insights AB (consulting service) - Stockholm Environment Institute - Architects Sweden (Sveriges Arkitekter) - Innventia/RISE (government-owned research institute) - Södra Skogsägarna (forest-owner association) - Skorgorsk (central research body for the Swedish forestry sector) - Sveaskog (forest industry) | Group 4   - Federation of Swedish Family Forest Owners (LRF Skogsägarna) - We Effect (NGO) - Sveaskog (forest industry) - Swedish Trade and Invest Council (Business Sweden) - Church of Sweden (Svenska Kyrkan) - Cluster of Forest Technology (Skogstekniska Klustret) - World Wide Fund for Nature WWF (Världsnaturfonden) - Stora Enso (forest industry) - SCA (forest industry) - Swedish Forestry Association (Föreningen Skogen) - SIWI Stockholm International Water Institute (SIWI) - Norrskog (forest-owner association) - Swedish International Development Cooperation Agency (SIDA) |
